# Supplementary material
Source: PubMed Central journal article supplement (PMC3266184)

**Supplemental Figure 1.** Normal tissue or small intestine adenomas from *Apc<sup>Min</sup>* mice were harvested at around 120 days of age. Tumor material was snap frozen and analyzed by qRT-PCR analysis for expression of *Chk2* and *c-Myc* transcript levels.

**Supplemental Figure 2.** NIH-3T3 fibroblasts infected with MSCV-Myc-IRES-GFP retroviruses and shRNA against *Chk2* or a non-target shRNA were stained with antibodies against tubulin and was scored for the amount of cells situated in mitosis. *Chk2* deficient cells have a higher percentage of cells in mitosis (9% vs. 2% for control infected cells).

**Supplemental Figure 3.** (A) Mouse lymphoma cell line from the  $\lambda$ -*Myc* transgenic mouse was infected with shRNA against *Chk2* or control vector. These cells were then stained with antibodies against tubulin and counter stained with PI. Representative picture of the polyploid (arrow) cells observed in the *Chk2* deficient cells. (B) Growth curve of the cells described in (A). *Chk2* deficiency severely impacts the division rate of the lymphoma cells. (C) The *Chk2* deficient lymphoma cells were also transplanted in recipient CL57/B6 animals and monitored for palpable lymphoma. Disease progression was significantly delayed in mice transplanted with cell lacking *Chk2* (Median survival 29 days vs. 17 days of control cells.  $P = 0.0295$ ). When sick, tumors were snap frozen and analyzed with western blot for expression of *Chk2*. Tick on survival curve represents a false positive sample harvested.

# Supplemental Figure 1

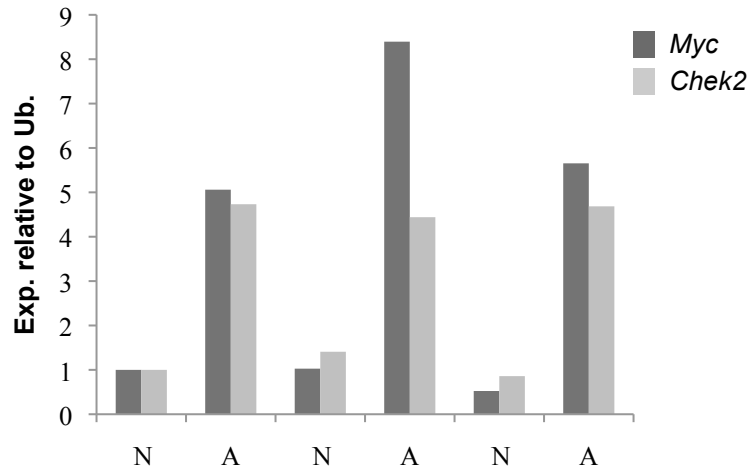

## Supplemental Figure 2

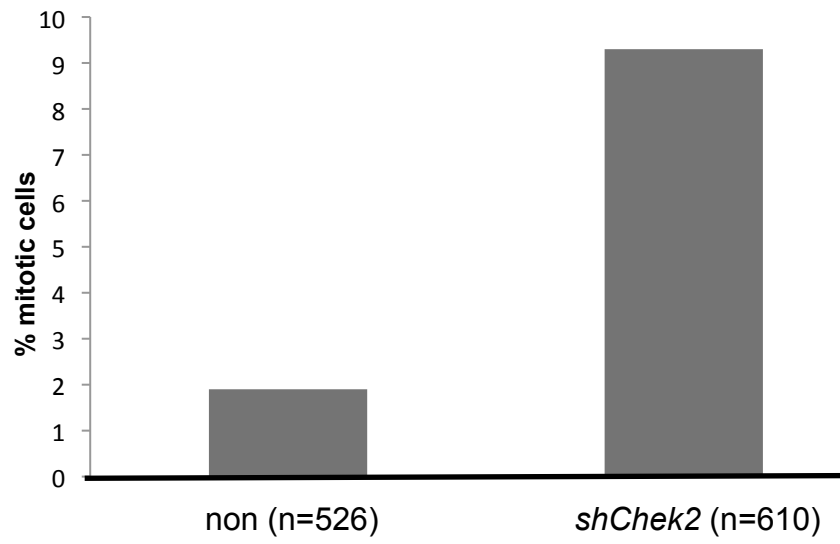

# Supplemental figure 3

**A**

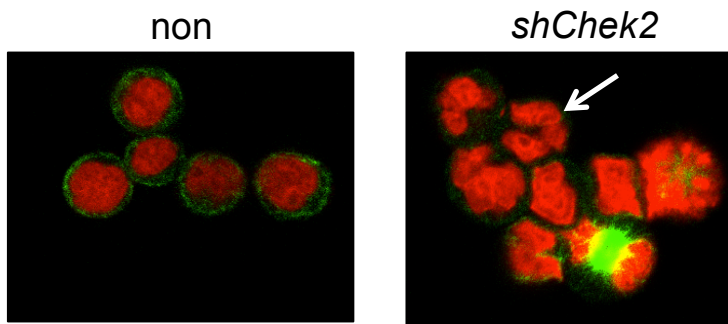

**B**

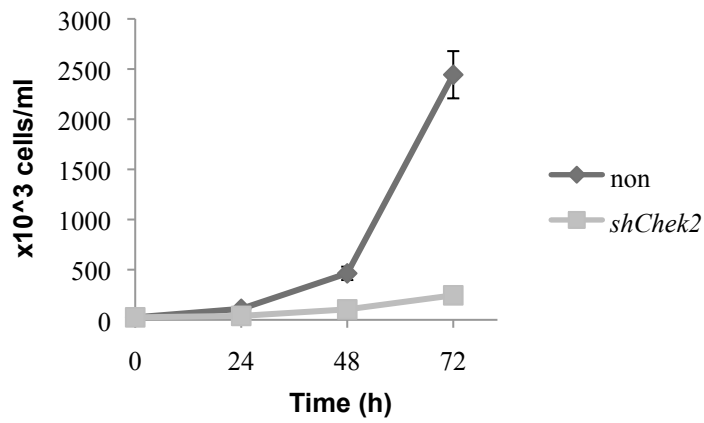

**C**

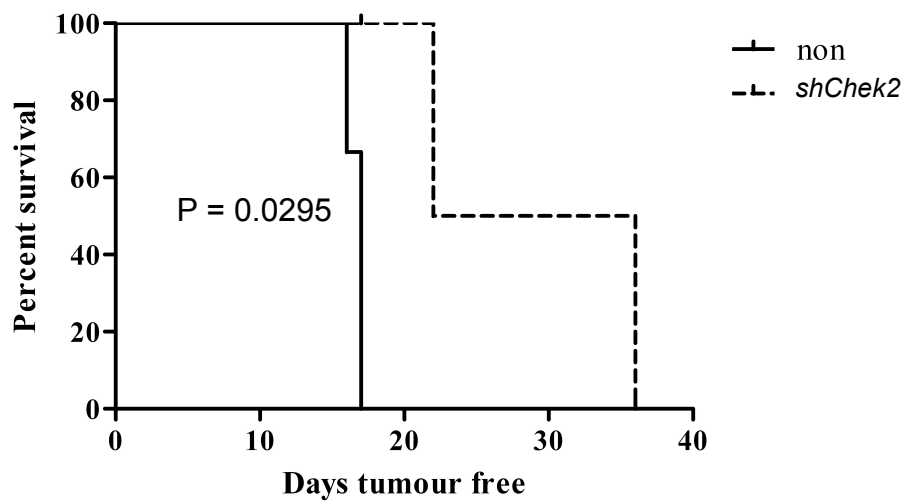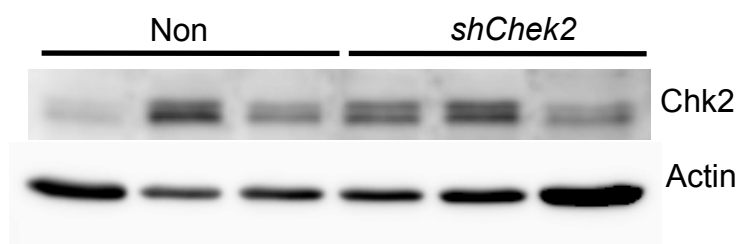

Supplement: cc1020_3598SD1.pdf [file cc1020_3598SD1.pdf]
